# Supplementary material for: Partial least squares path modeling using ordinal categorical indicators
Source: PubMed Central journal article supplement (PMC5794891; doi:10.1007/s11135-016-0401-7), 2016-09-14
Supplement: 11135_2016_401_MOESM1_ESM.pdf [file 11135_2016_401_MOESM1_ESM.pdf]

# Supplementary material: Partial least squares path modeling using ordinal categorical indicators

## Quality & Quantity

In the following the results of the ADD approach for two categories and the results of the NONE approach for more than two categories are presented. These are the results used in the paper. Every second row contains the average standard deviations of the parameter estimates. The last four columns contain the number of inadmissible results

- *Load*: absolute factor loading is larger than 1.
- *CompCor*: Correlation matrix between the composites/common factors is non positive-definite.
- *notc*: The PLS algorithm is not converged.
- *Boot*: number of inadmissible solutions during the bootstrap procedure.

Table 1: Results for the model with three common factors

| Threshold dist. | Estimator | # cat | $\gamma_1=0.6$   | $\gamma_2=0.0$    | $\beta=0.6$      | $\lambda_{x_1}=0.8$ | $\lambda_{x_2}=0.7$ | $\lambda_{x_3}=0.6$ | $\lambda_{y_{11}}=0.7$ | $\lambda_{y_{12}}=0.7$ | $\lambda_{y_{13}}=0.7$ | $\lambda_{y_{21}}=0.5$ | $\lambda_{y_{22}}=0.7$ | $\lambda_{y_{23}}=0.9$ | Load.            | CompCor | notc | Boot   |   |
|-----------------|-----------|-------|------------------|-------------------|------------------|---------------------|---------------------|---------------------|------------------------|------------------------|------------------------|------------------------|------------------------|------------------------|------------------|---------|------|--------|---|
| Symmetric       | PLS       | 2     | 0.3549<br>0.0395 | 0.1053<br>0.0465  | 0.3246<br>0.0436 | 0.8005<br>0.0332    | 0.7453<br>0.0417    | 0.6645<br>0.0534    | 0.7420<br>0.0348       | 0.7408<br>0.0349       | 0.7405<br>0.0350       | 0.5784<br>0.0649       | 0.7545<br>0.0406       | 0.8514<br>0.0254       | 0.00             | 0.00    | 0.00 | 0      |   |
|                 |           | 3     | 0.3996<br>0.0369 | 0.1013<br>0.0451  | 0.3684<br>0.0415 | 0.8237<br>0.0237    | 0.7720<br>0.0311    | 0.6990<br>0.0410    | 0.7678<br>0.0264       | 0.7680<br>0.0264       | 0.7680<br>0.0264       | 0.6140<br>0.0517       | 0.7829<br>0.0299       | 0.8689<br>0.0176       | 0.00             | 0.00    | 0.00 | 0      |   |
|                 |           | 5     | 0.4326<br>0.0359 | 0.0973<br>0.0449  | 0.4007<br>0.0409 | 0.8474<br>0.0179    | 0.7985<br>0.0247    | 0.7259<br>0.0343    | 0.7941<br>0.0215       | 0.7946<br>0.0215       | 0.7940<br>0.0215       | 0.6443<br>0.0443       | 0.8117<br>0.0236       | 0.8898<br>0.0126       | 0.00             | 0.00    | 0.00 | 0      |   |
|                 |           | 7     | 0.4415<br>0.0355 | 0.0945<br>0.0447  | 0.4116<br>0.0407 | 0.8550<br>0.0164    | 0.8079<br>0.0229    | 0.7348<br>0.0323    | 0.8025<br>0.0202       | 0.8023<br>0.0203       | 0.8020<br>0.0203       | 0.6532<br>0.0424       | 0.8211<br>0.0219       | 0.8967<br>0.0113       | 0.00             | 0.00    | 0.00 | 0      |   |
|                 | OrdPLS    | 2     | 0.4582<br>0.0486 | 0.0935<br>0.0685  | 0.4251<br>0.0618 | 0.8624<br>0.0270    | 0.8170<br>0.0359    | 0.7428<br>0.0487    | 0.8126<br>0.0320       | 0.8111<br>0.0321       | 0.8111<br>0.0322       | 0.6618<br>0.0626       | 0.8310<br>0.0348       | 0.9037<br>0.0195       | 0.00             | 0.00    | 0.00 | 0      |   |
|                 |           | 3     | 0.4553<br>0.0412 | 0.0900<br>0.0553  | 0.4257<br>0.0502 | 0.8635<br>0.0209    | 0.8173<br>0.0286    | 0.7459<br>0.0391    | 0.8116<br>0.0255       | 0.8115<br>0.0255       | 0.8118<br>0.0255       | 0.6619<br>0.0509       | 0.8320<br>0.0273       | 0.9042<br>0.0149       | 0.00             | 0.00    | 0.00 | 0      |   |
|                 |           | 5     | 0.4543<br>0.0372 | 0.0920<br>0.0484  | 0.4235<br>0.0439 | 0.8637<br>0.0170    | 0.8170<br>0.0239    | 0.7449<br>0.0335    | 0.8121<br>0.0212       | 0.8123<br>0.0212       | 0.8119<br>0.0212       | 0.6637<br>0.0439       | 0.8319<br>0.0227       | 0.9044<br>0.0117       | 0.00             | 0.00    | 0.00 | 0      |   |
|                 |           | 7     | 0.4531<br>0.0361 | 0.0916<br>0.0465  | 0.4240<br>0.0422 | 0.8639<br>0.0159    | 0.8179<br>0.0225    | 0.7451<br>0.0319    | 0.8122<br>0.0201       | 0.8119<br>0.0201       | 0.8117<br>0.0201       | 0.6637<br>0.0421       | 0.8320<br>0.0214       | 0.9045<br>0.0109       | 0.00             | 0.00    | 0.00 | 0      |   |
|                 | PLSc      | 2     | 0.5890<br>0.0667 | 0.0068<br>0.1226  | 0.5809<br>0.1176 | 0.6512<br>0.0668    | 0.5715<br>0.0689    | 0.4844<br>0.0738    | 0.5706<br>0.0550       | 0.5708<br>0.0551       | 0.5695<br>0.0551       | 0.4043<br>0.0788       | 0.5693<br>0.0669       | 0.7417<br>0.0643       | 0.00             | 0.00    | 0.00 | 6887   |   |
|                 |           | 3     | 0.6018<br>0.0549 | -0.0047<br>0.0995 | 0.6045<br>0.0938 | 0.7090<br>0.0566    | 0.6207<br>0.0596    | 0.5324<br>0.0650    | 0.6203<br>0.0466       | 0.6217<br>0.0465       | 0.6198<br>0.0466       | 0.4413<br>0.0697       | 0.6198<br>0.0565       | 0.7976<br>0.0529       | 0.00             | 0.00    | 0.00 | 7525   |   |
|                 |           | 5     | 0.6024<br>0.0487 | 0.0002<br>0.0848  | 0.6013<br>0.0792 | 0.7626<br>0.0501    | 0.6669<br>0.0537    | 0.5711<br>0.0601    | 0.6681<br>0.0418       | 0.6693<br>0.0418       | 0.6673<br>0.0418       | 0.4771<br>0.0649       | 0.6663<br>0.0506       | 0.8568<br>0.0448       | 1.00             | 0.00    | 0.00 | 19029  |   |
|                 |           | 7     | 0.6012<br>0.0470 | -0.0008<br>0.0811 | 0.6025<br>0.0755 | 0.7793<br>0.0482    | 0.6831<br>0.0520    | 0.5838<br>0.0586    | 0.6826<br>0.0403       | 0.6826<br>0.0403       | 0.6818<br>0.0403       | 0.4870<br>0.0632       | 0.6808<br>0.0487       | 0.8764<br>0.0421       | 3.00             | 0.00    | 0.00 | 30651  |   |
|                 | OrdPLSc   | 2     | 0.6067<br>0.0662 | -0.0015<br>0.1339 | 0.6111<br>0.1253 | 0.7935<br>0.0749    | 0.6998<br>0.0810    | 0.5970<br>0.0885    | 0.6992<br>0.0643       | 0.6995<br>0.0644       | 0.6972<br>0.0645       | 0.5032<br>0.0948       | 0.6996<br>0.0776       | 0.8828<br>0.0642       | 99.00            | 0.00    | 0.00 | 199431 |   |
|                 |           | 3     | 0.5971<br>0.0639 | -0.0018<br>0.0997 | 0.6014<br>0.1009 | 0.8006<br>0.0600    | 0.7052<br>0.0689    | 0.6064<br>0.0779    | 0.7032<br>0.0563       | 0.7054<br>0.0558       | 0.7034<br>0.0563       | 0.5079<br>0.0844       | 0.7065<br>0.0679       | 0.8911<br>0.0490       | 48.00            | 0.00    | 0.00 | 83035  |   |
|                 |           | 5     | 0.6006<br>0.0561 | 0.0013<br>0.0856  | 0.5998<br>0.0852 | 0.7999<br>0.0518    | 0.7002<br>0.0596    | 0.6007<br>0.0678    | 0.7017<br>0.0478       | 0.7027<br>0.0478       | 0.7010<br>0.0479       | 0.5031<br>0.0741       | 0.7009<br>0.0584       | 0.8948<br>0.0427       | 19.00            | 0.00    | 0.00 | 55107  |   |
|                 |           | 7     | 0.5996<br>0.0538 | 0.0001<br>0.0817  | 0.6013<br>0.0811 | 0.7998<br>0.0492    | 0.7012<br>0.0568    | 0.6003<br>0.0650    | 0.7009<br>0.0454       | 0.7013<br>0.0454       | 0.7002<br>0.0454       | 0.5012<br>0.0710       | 0.7002<br>0.0553       | 0.8966<br>0.0406       | 14.00            | 0.00    | 0.00 | 48640  |   |
|                 | WLSMV     | 2     | 0.6061<br>0.0652 | -0.0017<br>0.1177 | 0.6069<br>0.1114 | 0.7965<br>0.0578    | 0.7024<br>0.0582    | 0.5990<br>0.0607    | 0.7031<br>0.0531       | 0.7002<br>0.0532       | 0.6998<br>0.0533       | 0.5035<br>0.0622       | 0.7042<br>0.0563       | 0.8915<br>0.0575       | 49.00            | 0.00    | 0.00 | 50.00  |   |
|                 |           | 3     | 0.6045<br>0.0542 | -0.0061<br>0.0944 | 0.6074<br>0.0889 | 0.7990<br>0.0459    | 0.7018<br>0.0469    | 0.6019<br>0.0494    | 0.7001<br>0.0430       | 0.7005<br>0.0429       | 0.7001<br>0.0429       | 0.5006<br>0.0516       | 0.7011<br>0.0455       | 0.8974<br>0.0458       | 15.00            | 0.00    | 0.00 | 15.00  |   |
|                 |           | 5     | 0.6039<br>0.0474 | -0.0009<br>0.0808 | 0.6025<br>0.0753 | 0.7985<br>0.0373    | 0.7005<br>0.0388    | 0.5999<br>0.0420    | 0.7006<br>0.0356       | 0.7013<br>0.0357       | 0.7000<br>0.0357       | 0.5014<br>0.0442       | 0.6996<br>0.0374       | 0.8986<br>0.0363       | 0.00             | 0.00    | 0.00 | 0.00   |   |
|                 |           | 7     | 0.6025<br>0.0453 | -0.0014<br>0.0765 | 0.6033<br>0.0712 | 0.7987<br>0.0346    | 0.7019<br>0.0363    | 0.6001<br>0.0396    | 0.7005<br>0.0336       | 0.7003<br>0.0336       | 0.6996<br>0.0336       | 0.5011<br>0.0420       | 0.6995<br>0.0350       | 0.8987<br>0.0335       | 1.00             | 0.00    | 0.00 | 1.00   |   |
|                 | Moderate  | PLS   | 2                | 0.3463<br>0.0409  | 0.1035<br>0.0476 | 0.3186<br>0.0449    | 0.7964<br>0.0358    | 0.7424<br>0.0446    | 0.6613<br>0.0567       | 0.7380<br>0.0374       | 0.7370<br>0.0375       | 0.7356<br>0.0377       | 0.5733<br>0.0686       | 0.7518<br>0.0434       | 0.8490<br>0.0273 | 0.00    | 0.00 | 0.00   | 0 |
|                 |           |       | 3                | 0.4051<br>0.0370  | 0.1013<br>0.0453 | 0.3734<br>0.0418    | 0.8299<br>0.0223    | 0.7786<br>0.0298    | 0.7042<br>0.0399       | 0.7743<br>0.0254       | 0.7755<br>0.0252       | 0.7751<br>0.0253       | 0.6209<br>0.0504       | 0.7906<br>0.0286       | 0.8754<br>0.0162 | 0.00    | 0.00 | 0.00   | 0 |
|                 |           |       | 5                | 0.4238<br>0.0370  | 0.0966<br>0.0456 | 0.3950<br>0.0420    | 0.8445<br>0.0193    | 0.7949<br>0.0264    | 0.7211<br>0.0365       | 0.7904<br>0.0230       | 0.7901<br>0.0230       | 0.7901<br>0.0231       | 0.7894<br>0.0470       | 0.6366<br>0.0252       | 0.8087<br>0.0135 | 0.00    | 0.00 | 0.00   | 0 |
|                 |           |       | 7                | 0.4352<br>0.0364  | 0.0953<br>0.0453 | 0.4055<br>0.0416    | 0.8516<br>0.0175    | 0.8028<br>0.0245    | 0.7306<br>0.0341       | 0.7985<br>0.0214       | 0.7980<br>0.0214       | 0.7977<br>0.0215       | 0.6472<br>0.0444       | 0.8173<br>0.0232       | 0.8941<br>0.0121 | 0.00    | 0.00 | 0.00   | 0 |
| OrdPLS          |           | 2     | 0.4567<br>0.0506 | 0.0923<br>0.0718  | 0.4257<br>0.0645 | 0.8611<br>0.0286    | 0.8175<br>0.0375    | 0.7439<br>0.0509    | 0.8117<br>0.0338       | 0.8103<br>0.0338       | 0.8094<br>0.0340       | 0.6619<br>0.0654       | 0.8310<br>0.0365       | 0.9032<br>0.0206       | 0.00             | 0.00    | 0.00 | 0      |   |
|                 |           | 3     | 0.4547<br>0.0408 | 0.0921<br>0.0542  | 0.4236<br>0.0493 | 0.8630<br>0.0201    | 0.8168<br>0.0277    | 0.7449<br>0.0382    | 0.8115<br>0.0247       | 0.8126<br>0.0244       | 0.8124<br>0.0246       | 0.6634<br>0.0496       | 0.8316<br>0.0265       | 0.9043<br>0.0141       | 0.00             | 0.00    | 0.00 | 0      |   |
|                 |           | 5     | 0.4533<br>0.0381 | 0.0913<br>0.0497  | 0.4245<br>0.0451 | 0.8636<br>0.0177    | 0.8174<br>0.0247    | 0.7454<br>0.0346    | 0.8123<br>0.0220       | 0.8121<br>0.0220       | 0.8112<br>0.0220       | 0.6629<br>0.0453       | 0.8322<br>0.0234       | 0.9044<br>0.0122       | 0.00             | 0.00    | 0.00 | 0      |   |
|                 |           | 7     | 0.4534<br>0.0365 | 0.0919<br>0.0471  | 0.4236<br>0.0428 | 0.8638<br>0.0163    | 0.8169<br>0.0230    | 0.7455<br>0.0324    | 0.8122<br>0.0204       | 0.8119<br>0.0204       | 0.8117<br>0.0205       | 0.6637<br>0.0427       | 0.8321<br>0.0218       | 0.9045<br>0.0111       | 0.00             | 0.00    | 0.00 | 0      |   |
| PLSc            |           | 2     | 0.5829<br>0.0700 | 0.0055<br>0.1291  | 0.5785<br>0.1241 | 0.6420<br>0.0703    | 0.5653<br>0.0725    | 0.4803<br>0.0771    | 0.5630<br>0.0578       | 0.5629<br>0.0579       | 0.5605<br>0.0579       | 0.3996<br>0.0818       | 0.5647<br>0.0701       | 0.7322<br>0.0678       | 0.00             | 0.00    | 0.00 | 6114   |   |
|                 |           | 3     | 0.5972<br>0.0541 | 0.0026<br>0.0950  | 0.5938<br>0.0896 | 0.7229<br>0.0557    | 0.6328<br>0.0588    | 0.5395<br>0.0646    | 0.6330<br>0.0460       | 0.6349<br>0.0459       | 0.6329<br>0.0460       | 0.4513<br>0.0694       | 0.6309<br>0.0558       | 0.8154<br>0.0514       | 1.00             | 0.00    | 0.00 | 10166  |   |
|                 |           | 5     | 0.5965<br>0.0509 | -0.0007<br>0.0876 | 0.5985<br>0.0823 | 0.7555<br>0.0528    | 0.6600<br>0.0563    | 0.5654<br>0.0626    | 0.6607<br>0.0440       | 0.6616<br>0.0440       | 0.6595<br>0.0439       | 0.4692<br>0.0673       | 0.6600<br>0.0529       | 0.8513<br>0.0471       | 1.00             | 0.00    | 0.00 | 20152  |   |
|                 |           | 7     | 0.5992<br>0.0488 | -0.0002<br>0.0838 | 0.5997<br>0.0784 | 0.7716<br>0.0502    | 0.6743<br>0.0540    | 0.5777<br>0.0604    | 0.6758<br>0.0421       | 0.6755<br>0.0421       | 0.6739<br>0.0420       | 0.4807<br>0.0653       | 0.6739<br>0.0507       | 0.8691<br>0.0442       | 1.00             | 0.00    | 0.00 | 29261  |   |
| OrdPLSc         |           | 2     | 0.6061<br>0.0688 | -0.0040<br>0.1421 | 0.6123<br>0.1328 | 0.7891<br>0.0780    | 0.7018<br>0.0844    | 0.5964<br>0.0928    | 0.6981<br>0.0672       | 0.6981<br>0.0674       | 0.6940<br>0.0676       | 0.5024<br>0.0992       | 0.7015<br>0.0814       | 0.8799<br>0.0670       | 88.00            | 0.00    | 0.00 | 202684 |   |
|                 |           | 3     | 0.5973<br>0.0628 | 0.0029<br>0.0970  | 0.5971<br>0.0976 | 0.7996<br>0.0586    | 0.7032<br>0.0674    | 0.6021<br>0.0768    | 0.7029<br>0.0547       | 0.7055<br>0.0545       | 0.7034<br>0.0549       | 0.5073<br>0.0830       | 0.7030<br>0.0666       | 0.8926<br>0.0476       | 37.00            | 0.00    | 0.00 | 78073  |   |
|                 |           | 5     | 0.5980<br>0.0574 | 0.0003<br>0.0878  | 0.6009<br>0.0876 | 0.7997<br>0.0534    | 0.7016<br>0.0614    | 0.6035<br>0.0695    | 0.7026<br>0.0492       | 0.7037<br>0.0490       | 0.7015<br>0.0492       | 0.5049<br>0.0757       | 0.7028<br>0.0597       | 0.8942<br>0.0435       | 29.00            | 0.00    | 0.00 | 58129  |   |
|                 |           | 7     | 0.6001<br>0.0545 | 0.0004<br>0.0829  | 0.6005<br>0.0823 | 0.8000<br>0.0502    | 0.7002<br>0.0576    | 0.6001<br>0.0660    | 0.7015<br>0.0462       | 0.7016<br>0.0462       | 0.7002<br>0.0463       | 0.5017<br>0.0721       | 0.7003<br>0.0564       | 0.8965<br>0.0412       | 15.00            | 0.00    | 0.00 | 51433  |   |
| WLSMV           |           | 2     | 0.6053<br>0.0679 | -0.0033<br>0.1231 | 0.6088<br>0.1165 | 0.7947<br>0.0600    | 0.7034<br>0.0604    | 0.6012<br>0.0629    | 0.7007<br>0.0554       | 0.6994<br>0.0555       | 0.6980<br>0.0555       | 0.5024<br>0.0647       | 0.7046<br>0.0585       | 0.8897<br>0.0598       | 49.00            | 0.00    | 0.00 | 49.00  |   |
|                 |           | 3     | 0.6037<br>0.0533 | -0.0007<br>0.0921 | 0.6023<br>0.0863 | 0.7970<br>0.0440    | 0.7003<br>0.0452    | 0.6010<br>0.0481    | 0.7001<br>0.0415       | 0.7021<br>0.0414       | 0.7011<br>0.0415       | 0.5019<br>0.0502       | 0.7005<br>0.0436       | 0.8979<br>0.0432       | 11.00            | 0.00    | 0.00 | 11.00  |   |
|                 |           | 5     | 0.6025<br>0.0484 | -0.0023<br>0.0826 | 0.6044<br>0.0772 | 0.7987<br>0.0385    | 0.7013<br>0.0399    | 0.6006<br>0.0431    | 0.7006<br>0.0369       | 0.7011<br>0.0368       | 0.6989<br>0.0368       | 0.5004<br>0.0454       | 0.7005<br>0.0385       | 0.8980<br>0.0376       | 6.00             | 0.00    | 0.00 | 6.00   |   |
|                 |           | 7     | 0.6028<br>0.0455 | -0.0009<br>0.0771 | 0.6026<br>0.0718 | 0.7988<br>0.0354    | 0.7002<br>0.0369    | 0.6005<br>0.0400    | 0.7008<br>0.0340       | 0.7004<br>0.0340       | 0.6992<br>0.0341       | 0.5011<br>0.0423       | 0.6998<br>0.0355       | 0.8987<br>0.0343       | 2.00             | 0.00    | 0.00 | 2.00   |   |

Table 2: Results for the model with three common factors

| Threshold dist. | Estimator | # cat  | $\gamma_1=0.6$ | $\gamma_2=0.0$ | $\beta=0.6$ | $\lambda_{x_1}=0.8$ | $\lambda_{x_2}=0.7$ | $\lambda_{x_3}=0.6$ | $\lambda_{y_{11}}=0.7$ | $\lambda_{y_{12}}=0.7$ | $\lambda_{y_{13}}=0.7$ | $\lambda_{y_{21}}=0.5$ | $\lambda_{y_{22}}=0.7$ | $\lambda_{y_{23}}=0.9$ | Load.  | CompCor | note   | Boot   |
|-----------------|-----------|--------|----------------|----------------|-------------|---------------------|---------------------|---------------------|------------------------|------------------------|------------------------|------------------------|------------------------|------------------------|--------|---------|--------|--------|
| Ext. Asymm.     | PLS       | 2      | 0.2966         | 0.0902         | 0.2842      | 0.7817              | 0.7124              | 0.6269              | 0.7114                 | 0.7113                 | 0.7121                 | 0.5240                 | 0.7228                 | 0.8409                 | 0.00   | 0.00    | 0.00   | 0      |
|                 |           | 3      | 0.0517         | 0.0568         | 0.0555      | 0.0613              | 0.0754              | 0.0910              | 0.0608                 | 0.0610                 | 0.0607                 | 0.1041                 | 0.0722                 | 0.0468                 | 0.00   | 0.00    | 0.00   | 0      |
|                 |           | 5      | 0.3539         | 0.0957         | 0.3321      | 0.8119              | 0.7523              | 0.6701              | 0.7477                 | 0.7482                 | 0.7486                 | 0.5760                 | 0.7667                 | 0.8639                 | 0.00   | 0.00    | 0.00   | 0      |
|                 | OrdPLS    | 2      | 0.4586         | 0.0801         | 0.4416      | 0.8620              | 0.8126              | 0.7421              | 0.8080                 | 0.8078                 | 0.8092                 | 0.6529                 | 0.8291                 | 0.9028                 | 0.00   | 0.00    | 0.00   | 0      |
|                 |           | 3      | 0.4564         | 0.0888         | 0.4293      | 0.8623              | 0.8157              | 0.7443              | 0.8099                 | 0.8102                 | 0.8109                 | 0.6603                 | 0.8312                 | 0.9035                 | 0.00   | 0.00    | 0.00   | 0      |
|                 |           | 5      | 0.0401         | 0.0476         | 0.0450      | 0.0237              | 0.0320              | 0.0434              | 0.0277                 | 0.0279                 | 0.0276                 | 0.0552                 | 0.0306                 | 0.0167                 | 0.00   | 0.00    | 0.00   | 0      |
|                 | PLSc      | 2      | 0.3991         | 0.0967         | 0.3708      | 0.8345              | 0.7819              | 0.7036              | 0.7767                 | 0.7758                 | 0.7766                 | 0.6139                 | 0.7972                 | 0.8817                 | 0.00   | 0.00    | 0.00   | 0      |
|                 |           | 3      | 0.4159         | 0.0959         | 0.3872      | 0.8443              | 0.7932              | 0.7166              | 0.7881                 | 0.7875                 | 0.7879                 | 0.6296                 | 0.8088                 | 0.8894                 | 0.00   | 0.00    | 0.00   | 0      |
|                 |           | 5      | 0.0387         | 0.0468         | 0.0437      | 0.0204              | 0.0282              | 0.0390              | 0.0246                 | 0.0247                 | 0.0246                 | 0.0502                 | 0.0269                 | 0.0142                 | 0.00   | 0.00    | 0.00   | 0      |
|                 | OrdPLSc   | 2      | 0.4586         | 0.0801         | 0.4416      | 0.8620              | 0.8126              | 0.7421              | 0.8080                 | 0.8078                 | 0.8092                 | 0.6529                 | 0.8291                 | 0.9028                 | 0.00   | 0.00    | 0.00   | 0      |
|                 |           | 3      | 0.4564         | 0.0888         | 0.4293      | 0.8623              | 0.8157              | 0.7443              | 0.8099                 | 0.8102                 | 0.8109                 | 0.6603                 | 0.8312                 | 0.9035                 | 0.00   | 0.00    | 0.00   | 0      |
|                 |           | 5      | 0.0423         | 0.0561         | 0.0509      | 0.0203              | 0.0280              | 0.0391              | 0.0250                 | 0.0251                 | 0.0250                 | 0.0515                 | 0.0268                 | 0.0140                 | 0.00   | 0.00    | 0.00   | 0      |
|                 | WLSMV     | 2      | 0.5514         | -0.0144        | 0.5726      | 0.5990              | 0.5135              | 0.4325              | 0.5145                 | 0.5140                 | 0.5130                 | 0.3485                 | 0.5124                 | 0.6939                 | 3.00   | 0.00    | 0.00   | 42061  |
|                 |           | 3      | 0.0980         | 0.1930         | 0.1873      | 0.1004              | 0.1021              | 0.1059              | 0.0811                 | 0.0813                 | 0.0815                 | 0.1074                 | 0.0990                 | 0.0961                 | 0.00   | 0.00    | 0.00   | 18581  |
|                 |           | 5      | 0.5669         | 0.0005         | 0.5694      | 0.6763              | 0.5846              | 0.4946              | 0.5838                 | 0.5851                 | 0.5836                 | 0.4072                 | 0.5858                 | 0.7733                 | 0.00   | 0.00    | 0.00   | 21914  |
|                 | OrdPLSc   | 2      | 0.5835         | 0.0025         | 0.5803      | 0.7302              | 0.6374              | 0.5427              | 0.6368                 | 0.6357                 | 0.6363                 | 0.4482                 | 0.6377                 | 0.8299                 | 1.00   | 0.00    | 0.00   | 21914  |
|                 |           | 3      | 0.0580         | 0.0971         | 0.0926      | 0.0602              | 0.0635              | 0.0698              | 0.0501                 | 0.0502                 | 0.0501                 | 0.0751                 | 0.0605                 | 0.0546                 | 2.00   | 0.00    | 0.00   | 27152  |
|                 |           | 5      | 0.5881         | 0.0026         | 0.5859      | 0.7535              | 0.6568              | 0.5602              | 0.6571                 | 0.6567                 | 0.6566                 | 0.4650                 | 0.6571                 | 0.8531                 | 0.00   | 0.00    | 0.00   | 27152  |
|                 | WLSMV     | 2      | 0.0537         | 0.0900         | 0.0852      | 0.0555              | 0.0593              | 0.0658              | 0.0465                 | 0.0466                 | 0.0465                 | 0.0707                 | 0.0561                 | 0.0494                 | 2.00   | 0.00    | 0.00   | 27152  |
|                 |           | 3      | 0.6072         | -0.0388        | 0.6550      | 0.7894              | 0.6937              | 0.5934              | 0.6971                 | 0.6951                 | 0.6909                 | 0.4927                 | 0.6971                 | 0.8638                 | 212.00 | 1.00    | 0.00   | 465423 |
|                 |           | 5      | 0.0930         | 0.2345         | 0.2140      | 0.1062              | 0.1195              | 0.1332              | 0.0933                 | 0.0932                 | 0.0939                 | 0.1446                 | 0.1166                 | 0.0938                 | 76.00  | 0.00    | 0.00   | 119120 |
|                 | OrdPLSc   | 2      | 0.5926         | -0.0027        | 0.6038      | 0.8009              | 0.7069              | 0.6055              | 0.7060                 | 0.7054                 | 0.7048                 | 0.5125                 | 0.7082                 | 0.8845                 | 0.00   | 0.00    | 0.00   | 77407  |
|                 |           | 3      | 0.0783         | 0.1322         | 0.1319      | 0.0721              | 0.0844              | 0.0973              | 0.0693                 | 0.0696                 | 0.0694                 | 0.1049                 | 0.0831                 | 0.0586                 | 33.00  | 0.00    | 0.00   | 77407  |
|                 |           | 5      | 0.6000         | -0.0019        | 0.6025      | 0.7980              | 0.7029              | 0.6021              | 0.7019                 | 0.7013                 | 0.7022                 | 0.5037                 | 0.7023                 | 0.8924                 | 28.00  | 0.00    | 0.00   | 59205  |
| WLSMV           | 2         | 0.0643 | 0.1010         | 0.1008         | 0.0593      | 0.0685              | 0.0779              | 0.0555              | 0.0556                 | 0.0554                 | 0.0852                 | 0.0673                 | 0.0479                 | 0.00                   | 0.00   | 0.00    | 59205  |        |
|                 | 3         | 0.5994 | 0.0009         | 0.6000         | 0.7993      | 0.7014              | 0.6018              | 0.7022              | 0.7021                 | 0.7012                 | 0.5044                 | 0.7020                 | 0.8937                 | 115.00                 | 1.00   | 0.00    | 130.00 |        |
|                 | 5         | 0.0589 | 0.0909         | 0.0905         | 0.0543      | 0.0625              | 0.0713              | 0.0501              | 0.0502                 | 0.0504                 | 0.0777                 | 0.0609                 | 0.0442                 | 33.00                  | 0.00   | 0.00    | 34.00  |        |
| OrdPLSc         | 2         | 0.6054 | -0.0265        | 0.6404         | 0.7972      | 0.7003              | 0.6023              | 0.6991              | 0.6979                 | 0.7006                 | 0.5022                 | 0.7073                 | 0.8822                 | 12.00                  | 0.00   | 0.00    | 12.00  |        |
|                 | 3         | 0.0902 | 0.1781         | 0.1681         | 0.0799      | 0.0800              | 0.0828              | 0.0730              | 0.0730                 | 0.0729                 | 0.0850                 | 0.0770                 | 0.0791                 | 6.00                   | 0.00   | 0.00    | 6.00   |        |
|                 | 5         | 0.6055 | -0.0108        | 0.6150         | 0.7971      | 0.7003              | 0.6013              | 0.6983              | 0.6985                 | 0.7001                 | 0.5019                 | 0.7038                 | 0.8927                 | 0.00                   | 0.00   | 0.00    | 34.00  |        |
| WLSMV           | 2         | 0.0677 | 0.1217         | 0.1144         | 0.0573      | 0.0583              | 0.0615              | 0.0536              | 0.0537                 | 0.0535                 | 0.0638                 | 0.0559                 | 0.0560                 | 0.00                   | 0.00   | 0.00    | 12.00  |        |
|                 | 3         | 0.6057 | -0.0042        | 0.6064         | 0.7973      | 0.7007              | 0.6005              | 0.7001              | 0.6992                 | 0.6992                 | 0.5002                 | 0.7012                 | 0.8963                 | 0.00                   | 0.00   | 0.00    | 12.00  |        |
|                 | 5         | 0.0545 | 0.0947         | 0.0885         | 0.0437      | 0.0452              | 0.0487              | 0.0418              | 0.0418                 | 0.0417                 | 0.0511                 | 0.0435                 | 0.0425                 | 0.00                   | 0.00   | 0.00    | 6.00   |        |
| Alt. Mod. Asym. | PLS       | 2      | 0.3443         | 0.1062         | 0.3166      | 0.7904              | 0.7279              | 0.6600              | 0.7325                 | 0.7277                 | 0.7311                 | 0.5788                 | 0.7320                 | 0.8387                 | 0.00   | 0.00    | 0.00   | 0      |
|                 |           | 3      | 0.0392         | 0.0467         | 0.0430      | 0.0360              | 0.0457              | 0.0561              | 0.0366                 | 0.0373                 | 0.0368                 | 0.0671                 | 0.0445                 | 0.0285                 | 0.00   | 0.00    | 0.00   | 0      |
|                 |           | 5      | 0.4048         | 0.1013         | 0.3733      | 0.8299              | 0.7780              | 0.7045              | 0.7747                 | 0.7745                 | 0.7742                 | 0.6208                 | 0.7897                 | 0.8746                 | 0.00   | 0.00    | 0.00   | 0      |
|                 | OrdPLS    | 2      | 0.0370         | 0.0453         | 0.0417      | 0.0223              | 0.0297              | 0.0398              | 0.0253                 | 0.0253                 | 0.0254                 | 0.0504                 | 0.0286                 | 0.0163                 | 0.00   | 0.00    | 0.00   | 0      |
|                 |           | 3      | 0.4235         | 0.0992         | 0.3923      | 0.8403              | 0.7863              | 0.7199              | 0.7872                 | 0.7872                 | 0.7872                 | 0.6388                 | 0.7977                 | 0.8820                 | 0.00   | 0.00    | 0.00   | 0      |
|                 |           | 5      | 0.0359         | 0.0450         | 0.0408      | 0.0192              | 0.0263              | 0.0357              | 0.0225                 | 0.0225                 | 0.0225                 | 0.0459                 | 0.0251                 | 0.0137                 | 0.00   | 0.00    | 0.00   | 0      |
|                 | WLSMV     | 2      | 0.4353         | 0.0967         | 0.4041      | 0.8495              | 0.7980              | 0.7296              | 0.7970                 | 0.7936                 | 0.7962                 | 0.6484                 | 0.8107                 | 0.8907                 | 0.00   | 0.00    | 0.00   | 0      |
|                 |           | 3      | 0.0356         | 0.0448         | 0.0407      | 0.0173              | 0.0241              | 0.0336              | 0.0209                 | 0.0210                 | 0.0210                 | 0.0437                 | 0.0231                 | 0.0121                 | 0.00   | 0.00    | 0.00   | 0      |
|                 |           | 5      | 0.4564         | 0.0907         | 0.4276      | 0.8624              | 0.8175              | 0.7433              | 0.8119                 | 0.8115                 | 0.8105                 | 0.6636                 | 0.8294                 | 0.9035                 | 0.00   | 0.00    | 0.00   | 0      |
|                 | OrdPLSc   | 2      | 0.0500         | 0.0712         | 0.0640      | 0.0288              | 0.0384              | 0.0509              | 0.0338                 | 0.0345                 | 0.0341                 | 0.0646                 | 0.0375                 | 0.0213                 | 0.00   | 0.00    | 0.00   | 0      |
|                 |           | 3      | 0.4545         | 0.0920         | 0.4236      | 0.8633              | 0.8170              | 0.7453              | 0.8121                 | 0.8122                 | 0.8117                 | 0.6631                 | 0.8314                 | 0.9040                 | 0.00   | 0.00    | 0.00   | 0      |
|                 |           | 5      | 0.0407         | 0.0542         | 0.0493      | 0.0201              | 0.0277              | 0.0381              | 0.0245                 | 0.0246                 | 0.0247                 | 0.0496                 | 0.0265                 | 0.0142                 | 0.00   | 0.00    | 0.00   | 0      |
|                 | WLSMV     | 2      | 0.4538         | 0.0912         | 0.4241      | 0.8638              | 0.8179              | 0.7447              | 0.8121                 | 0.8122                 | 0.8122                 | 0.6632                 | 0.8320                 | 0.9045                 | 0.00   | 0.00    | 0.00   | 0      |
|                 |           | 3      | 0.0379         | 0.0496         | 0.0450      | 0.0178              | 0.0247              | 0.0347              | 0.0220                 | 0.0221                 | 0.0220                 | 0.0452                 | 0.0236                 | 0.0123                 | 0.00   | 0.00    | 0.00   | 0      |
|                 |           | 5      | 0.4536         | 0.0919         | 0.4234      | 0.8641              | 0.8173              | 0.7450              | 0.8124                 | 0.8118                 | 0.8117                 | 0.6638                 | 0.8318                 | 0.9045                 | 0.00   | 0.00    | 0.00   | 0      |
|                 | OrdPLSc   | 2      | 0.0364         | 0.0471         | 0.0427      | 0.0162              | 0.0230              | 0.0324              | 0.0204                 | 0.0204                 | 0.0205                 | 0.0427                 | 0.0248                 | 0.0111                 | 0.00   | 0.00    | 0.00   | 4461   |
|                 |           | 3      | 0.5977         | -0.0031        | 0.6041      | 0.6253              | 0.5512              | 0.4670              | 0.5465                 | 0.5566                 | 0.5454                 | 0.3904                 | 0.5445                 | 0.7045                 | 0.00   | 0.00    | 0.00   | 9615   |
|                 |           | 5      | 0.0696         | 0.1380         | 0.1316      | 0.0679              | 0.0699              | 0.0750              | 0.0554                 | 0.0555                 | 0.0555                 | 0.0785                 | 0.0673                 | 0.0658                 | 0.00   | 0.00    | 0.00   | 11732  |
|                 | WLSMV     | 2      | 0.5973         | 0.0022         | 0.5951      | 0.7231              | 0.6317              | 0.5401              | 0.6323                 | 0.6340                 | 0.6316                 | 0.4505                 | 0.6307                 | 0.8127                 | 0.00   | 0.00    | 0.00   | 9615   |
|                 |           | 3      | 0.0540         | 0.0951         | 0.0897      | 0.0554              | 0.0588              | 0.0645              | 0.0458                 | 0.0459                 | 0.0460                 | 0.0693                 | 0.0558                 | 0.0515                 | 0.00   | 0.00    | 0.00   | 11732  |
|                 |           | 5      | 0.6045         | -0.0029        | 0.6074      | 0.7434              | 0.6541              | 0.5575              | 0.6503                 | 0.6582                 | 0.6502                 | 0.4641                 | 0.6510                 | 0.8345                 | 0.00   | 0.00    | 0.00   | 11732  |
|                 | OrdPLSc   | 2      | 0.0502         | 0.0895         | 0.0836      | 0.0514              | 0.0550              | 0.0610              | 0.0424                 | 0.0428                 | 0.0425                 | 0.0655                 | 0.0517                 | 0.0467                 | 1.00   | 0.00    | 0.00   | 21020  |
|                 |           | 3      | 0.6038         | -0.0019        | 0.6052      | 0.7653              | 0.6712              | 0.5729              | 0.6702                 | 0.6733                 | 0.6684                 | 0.4778                 | 0.6686                 | 0.8591                 | 0.00   | 0.00    | 0.00   | 21020  |
|                 |           | 5      | 0.0481         | 0.0843         | 0.0785      | 0.0493              | 0.0530              | 0.0594              | 0.0409                 | 0.0412                 | 0.0409                 | 0.0641                 | 0.0498                 | 0.0439                 | 119.00 | 0.00    | 0.00   | 233367 |
| WLSMV           | 2         | 0.6073 | -0.0095        | 0.6198         | 0.7926      | 0.6967              | 0.5980              | 0.6975              | 0.6994                 | 0.6976                 | 0.5057                 | 0.6993                 | 0.8800                 | 39.00                  | 0.00   | 0.00    | 75784  |        |
|                 | 3         | 0.0685 | 0.1433         | 0.1344         | 0.0786      | 0.0862              | 0.0923              | 0.0677              | 0.0681                 | 0.0679                 | 0.0978                 | 0.0826                 | 0.0679                 | 24.00                  | 0.00   | 0.00    | 61201  |        |
|                 | 5         | 0.5964 | 0.0031         | 0.5973         | 0.8011      | 0.7027              | 0.6030              | 0.                  |                        |                        |                        |                        |                        |                        |        |         |        |        |

Table 3: Results for the model with three common factors

| Threshold dist. | Estimator | # cat | $\gamma_1=0.6$   | $\gamma_2=0.0$    | $\beta=0.6$      | $\lambda_{x_1}=0.8$ | $\lambda_{x_2}=0.7$ | $\lambda_{x_3}=0.6$ | $\lambda_{y_{11}}=0.7$ | $\lambda_{y_{12}}=0.7$ | $\lambda_{y_{13}}=0.7$ | $\lambda_{y_{21}}=0.5$ | $\lambda_{y_{22}}=0.7$ | $\lambda_{y_{23}}=0.9$ | Load.  | CompCor | note | Boot    |
|-----------------|-----------|-------|------------------|-------------------|------------------|---------------------|---------------------|---------------------|------------------------|------------------------|------------------------|------------------------|------------------------|------------------------|--------|---------|------|---------|
| Alt. Ext. Asym. | PLS       | 2     | 0.2783<br>0.0413 | 0.1093<br>0.0505  | 0.2586<br>0.0443 | 0.7366<br>0.0670    | 0.6447<br>0.0862    | 0.6230<br>0.0849    | 0.6731<br>0.0596       | 0.6724<br>0.0700       | 0.6722<br>0.0599       | 0.5431<br>0.0971       | 0.6450<br>0.0861       | 0.7748<br>0.0617       | 0.00   | 0.00    | 0.00 | 0       |
|                 |           | 3     | 0.3461<br>0.0379 | 0.1122<br>0.0469  | 0.3182<br>0.0415 | 0.7806<br>0.0378    | 0.6946<br>0.0507    | 0.6665<br>0.0555    | 0.7246<br>0.0367       | 0.7072<br>0.0407       | 0.7245<br>0.0368       | 0.5919<br>0.0663       | 0.6969<br>0.0497       | 0.8179<br>0.0324       | 0.00   | 0.00    | 0.00 | 0       |
|                 |           | 5     | 0.3963<br>0.0367 | 0.1057<br>0.0458  | 0.3644<br>0.0412 | 0.8190<br>0.0242    | 0.7505<br>0.0332    | 0.7016<br>0.0417    | 0.7662<br>0.0264       | 0.7513<br>0.0274       | 0.7654<br>0.0266       | 0.6220<br>0.0526       | 0.7581<br>0.0321       | 0.8592<br>0.0188       | 0.00   | 0.00    | 0.00 | 0       |
|                 |           | 7     | 0.4145<br>0.0362 | 0.1025<br>0.0454  | 0.3825<br>0.0410 | 0.8332<br>0.0206    | 0.7711<br>0.0285    | 0.7149<br>0.0377    | 0.7808<br>0.0236       | 0.7690<br>0.0241       | 0.7802<br>0.0237       | 0.6351<br>0.0482       | 0.7808<br>0.0275       | 0.8736<br>0.0152       | 0.00   | 0.00    | 0.00 | 0       |
|                 | OrdPLS    | 2     | 0.4573<br>0.0808 | 0.0692<br>0.1222  | 0.4508<br>0.1201 | 0.8824<br>0.0502    | 0.8509<br>0.0656    | 0.7379<br>0.0808    | 0.8175<br>0.0582       | 0.8279<br>0.0667       | 0.8176<br>0.0584       | 0.6423<br>0.0987       | 0.8699<br>0.0627       | 0.9258<br>0.0400       | 0.00   | 0.00    | 0.00 | 0       |
|                 |           | 3     | 0.4578<br>0.0489 | 0.0885<br>0.0697  | 0.4323<br>0.0627 | 0.8641<br>0.0290    | 0.8171<br>0.0396    | 0.7434<br>0.0502    | 0.8125<br>0.0336       | 0.8121<br>0.0358       | 0.8123<br>0.0337       | 0.6628<br>0.0633       | 0.8309<br>0.0387       | 0.9041<br>0.0224       | 0.00   | 0.00    | 0.00 | 0       |
|                 |           | 5     | 0.4552<br>0.0411 | 0.0914<br>0.0550  | 0.4249<br>0.0498 | 0.8637<br>0.0207    | 0.8179<br>0.0287    | 0.7442<br>0.0389    | 0.8126<br>0.0250       | 0.8116<br>0.0258       | 0.8121<br>0.0252       | 0.6621<br>0.0505       | 0.8312<br>0.0276       | 0.9043<br>0.0148       | 0.00   | 0.00    | 0.00 | 0       |
|                 |           | 7     | 0.4542<br>0.0387 | 0.0921<br>0.0507  | 0.4235<br>0.0460 | 0.8635<br>0.0183    | 0.8181<br>0.0255    | 0.7447<br>0.0355    | 0.8120<br>0.0225       | 0.8116<br>0.0229       | 0.8120<br>0.0226       | 0.6630<br>0.0464       | 0.8317<br>0.0245       | 0.9042<br>0.0128       | 0.00   | 0.00    | 0.00 | 0       |
|                 | PLSc      | 2     | 0.6663<br>0.0992 | -0.0886<br>0.3259 | 0.7702<br>0.3071 | 0.4806<br>0.0845    | 0.4366<br>0.0789    | 0.3620<br>0.0869    | 0.4106<br>0.0662       | 0.4654<br>0.0659       | 0.4099<br>0.0663       | 0.2905<br>0.0867       | 0.4222<br>0.0755       | 0.5171<br>0.0839       | 0.00   | 31.00   | 0.00 | 157661  |
|                 |           | 3     | 0.6380<br>0.0709 | -0.0329<br>0.1706 | 0.6783<br>0.1611 | 0.5912<br>0.0660    | 0.5303<br>0.0658    | 0.4423<br>0.0727    | 0.5111<br>0.0528       | 0.5527<br>0.0533       | 0.5115<br>0.0528       | 0.3642<br>0.0751       | 0.5200<br>0.0627       | 0.6461<br>0.0642       | 0.00   | 0.00    | 0.00 | 5627    |
|                 |           | 5     | 0.6125<br>0.0564 | -0.0072<br>0.1079 | 0.6219<br>0.1012 | 0.6891<br>0.0564    | 0.6110<br>0.0591    | 0.5156<br>0.0652    | 0.6010<br>0.0459       | 0.6216<br>0.0467       | 0.5998<br>0.0460       | 0.4272<br>0.0695       | 0.6042<br>0.0561       | 0.7674<br>0.0533       | 0.00   | 0.00    | 0.00 | 4047    |
|                 |           | 7     | 0.6080<br>0.0525 | -0.0034<br>0.0958 | 0.6126<br>0.0897 | 0.7241<br>0.0530    | 0.6399<br>0.0563    | 0.5409<br>0.0626    | 0.6321<br>0.0434       | 0.6468<br>0.0442       | 0.6307<br>0.0435       | 0.4503<br>0.0670       | 0.6344<br>0.0533       | 0.8092<br>0.0491       | 0.00   | 0.00    | 0.00 | 7477    |
|                 | OrdPLSc   | 2     | 0.5858<br>0.1122 | -0.0287<br>0.3018 | 0.6369<br>0.2912 | 0.7962<br>0.1188    | 0.7153<br>0.1384    | 0.6311<br>0.1421    | 0.7271<br>0.1134       | 0.7087<br>0.1160       | 0.7229<br>0.1121       | 0.5413<br>0.1570       | 0.7212<br>0.1403       | 0.8535<br>0.1094       | 967.00 | 15.00   | 0.00 | 4484252 |
|                 |           | 3     | 0.5863<br>0.0771 | 0.0030<br>0.1286  | 0.5976<br>0.1315 | 0.8060<br>0.0712    | 0.7116<br>0.0867    | 0.6152<br>0.0937    | 0.7136<br>0.0698       | 0.7119<br>0.0718       | 0.7143<br>0.0695       | 0.5260<br>0.1009       | 0.7135<br>0.0857       | 0.8819<br>0.0602       | 117.00 | 0.00    | 0.00 | 146370  |
|                 |           | 5     | 0.5957<br>0.0637 | 0.0026<br>0.0984  | 0.5976<br>0.0995 | 0.8016<br>0.0592    | 0.7059<br>0.0696    | 0.6047<br>0.0775    | 0.7070<br>0.0556       | 0.7047<br>0.0564       | 0.7054<br>0.0558       | 0.5090<br>0.0842       | 0.7044<br>0.0684       | 0.8921<br>0.0487       | 53.00  | 0.00    | 0.00 | 84468   |
|                 |           | 7     | 0.5981<br>0.0590 | 0.0024<br>0.0900  | 0.5986<br>0.0902 | 0.8003<br>0.0547    | 0.7032<br>0.0634    | 0.6016<br>0.0719    | 0.7038<br>0.0507       | 0.7023<br>0.0511       | 0.7027<br>0.0507       | 0.5057<br>0.0778       | 0.7016<br>0.0621       | 0.8940<br>0.0449       | 31.00  | 0.00    | 0.00 | 64161   |
|                 | WLSMV     | 2     | 0.6217<br>0.1016 | -0.0424<br>0.2187 | 0.6785<br>0.2208 | 0.7846<br>0.1030    | 0.6861<br>0.1123    | 0.6087<br>0.0911    | 0.7016<br>0.0831       | 0.6860<br>0.0953       | 0.6941<br>0.0831       | 0.5148<br>0.0902       | 0.6850<br>0.1171       | 0.8495<br>0.1159       | 175.00 | 7.00    | 0.00 | 207.00  |
|                 |           | 3     | 0.6032<br>0.0658 | -0.0051<br>0.1182 | 0.6142<br>0.1131 | 0.8001<br>0.0628    | 0.7029<br>0.0646    | 0.6013<br>0.0618    | 0.7035<br>0.0551       | 0.7034<br>0.0583       | 0.7023<br>0.0553       | 0.5051<br>0.0626       | 0.7030<br>0.0634       | 0.8903<br>0.0659       | 80.00  | 0.00    | 0.00 | 84.00   |
|                 |           | 5     | 0.6041<br>0.0533 | -0.0035<br>0.0928 | 0.6053<br>0.0872 | 0.7987<br>0.0454    | 0.7028<br>0.0469    | 0.5999<br>0.0484    | 0.7020<br>0.0420       | 0.7008<br>0.0430       | 0.7004<br>0.0421       | 0.5007<br>0.0505       | 0.7003<br>0.0456       | 0.8969<br>0.0460       | 22.00  | 0.00    | 0.00 | 22.00   |
|                 |           | 7     | 0.6037<br>0.0493 | -0.0010<br>0.0846 | 0.6031<br>0.0792 | 0.7981<br>0.0399    | 0.7025<br>0.0415    | 0.6004<br>0.0440    | 0.7008<br>0.0378       | 0.7005<br>0.0383       | 0.7004<br>0.0378       | 0.5013<br>0.0462       | 0.6999<br>0.0402       | 0.8977<br>0.0396       | 9.00   | 0.00    | 0.00 | 9.00    |

Table 4: Results for the model with two composites and one common factor

| Threshold dist. | Estimator | # cat  | $\gamma_1=0.6$   | $\gamma_2=0.0$    | $\beta=0.6$       | $\lambda_{y_1}=0.5$ | $\lambda_{y_2}=0.7$ | $\lambda_{y_3}=0.9$ | $w_{x_1}=0.3$    | $w_{x_2}=0.5$    | $w_{x_3}=0.6$    | $w_{y_{11}}=0.4$ | $w_{y_{12}}=0.5$ | $w_{y_{13}}=0.5$ | Load.            | CompCor | note | Boot   |   |
|-----------------|-----------|--------|------------------|-------------------|-------------------|---------------------|---------------------|---------------------|------------------|------------------|------------------|------------------|------------------|------------------|------------------|---------|------|--------|---|
| Symmetric       | PLS       | 2      | 0.4451<br>0.0364 | 0.0757<br>0.0484  | 0.3767<br>0.0443  | 0.5796<br>0.0605    | 0.7553<br>0.0376    | 0.8515<br>0.0227    | 0.2995<br>0.0927 | 0.5556<br>0.0809 | 0.6051<br>0.0832 | 0.4552<br>0.0707 | 0.5094<br>0.0666 | 0.5204<br>0.0681 | 0.00             | 0.00    | 0.00 | 0      |   |
|                 |           | 3      | 0.5107<br>0.0327 | 0.0601<br>0.0474  | 0.4368<br>0.0425  | 0.6160<br>0.0483    | 0.7830<br>0.0277    | 0.8686<br>0.0158    | 0.3014<br>0.0785 | 0.5310<br>0.0756 | 0.6026<br>0.0712 | 0.4353<br>0.0592 | 0.5040<br>0.0553 | 0.5095<br>0.0568 | 0.00             | 0.00    | 0.00 | 0      |   |
|                 |           | 5      | 0.5670<br>0.0301 | 0.0290<br>0.0478  | 0.4953<br>0.0425  | 0.6443<br>0.0417    | 0.8120<br>0.0219    | 0.8897<br>0.0112    | 0.3005<br>0.0701 | 0.5113<br>0.0700 | 0.5994<br>0.0654 | 0.4134<br>0.0530 | 0.5019<br>0.0485 | 0.5029<br>0.0506 | 0.00             | 0.00    | 0.00 | 0      |   |
|                 |           | 7      | 0.5830<br>0.0294 | 0.0171<br>0.0480  | 0.5146<br>0.0424  | 0.6542<br>0.0399    | 0.8212<br>0.0203    | 0.8962<br>0.0101    | 0.2985<br>0.0680 | 0.5062<br>0.0686 | 0.5987<br>0.0641 | 0.4078<br>0.0513 | 0.4995<br>0.0468 | 0.5013<br>0.0490 | 0.00             | 0.00    | 0.00 | 0      |   |
|                 | OrdPLS    | 2      | 0.6104<br>0.0465 | -0.0059<br>0.0907 | 0.5485<br>0.0804  | 0.6636<br>0.0600    | 0.8314<br>0.0332    | 0.9035<br>0.0185    | 0.2980<br>0.1056 | 0.4963<br>0.1173 | 0.5936<br>0.1055 | 0.3924<br>0.0930 | 0.5019<br>0.0761 | 0.4992<br>0.0853 | 0.00             | 0.00    | 0.00 | 0      |   |
|                 |           | 3      | 0.6055<br>0.0370 | 0.0029<br>0.0672  | 0.5413<br>0.0597  | 0.6639<br>0.0483    | 0.8318<br>0.0260    | 0.9042<br>0.0138    | 0.2994<br>0.0844 | 0.4942<br>0.0916 | 0.5980<br>0.0829 | 0.3971<br>0.0706 | 0.5001<br>0.0598 | 0.4984<br>0.0656 | 0.00             | 0.00    | 0.00 | 0      |   |
|                 |           | 5      | 0.6048<br>0.0313 | 0.0017<br>0.0548  | 0.5405<br>0.0485  | 0.6638<br>0.0417    | 0.8321<br>0.0213    | 0.9042<br>0.0107    | 0.3001<br>0.0720 | 0.4957<br>0.0756 | 0.5983<br>0.0695 | 0.3973<br>0.0568 | 0.5005<br>0.0500 | 0.4990<br>0.0536 | 0.00             | 0.00    | 0.00 | 0      |   |
|                 |           | 7      | 0.6032<br>0.0299 | 0.0015<br>0.0515  | 0.5396<br>0.0455  | 0.6648<br>0.0397    | 0.8320<br>0.0200    | 0.9041<br>0.0098    | 0.2981<br>0.0688 | 0.4979<br>0.0714 | 0.5980<br>0.0661 | 0.3990<br>0.0532 | 0.4988<br>0.0475 | 0.4993<br>0.0504 | 0.00             | 0.00    | 0.00 | 0      |   |
|                 | PLSc      | 2      | 0.4451<br>0.0364 | 0.0942<br>0.0602  | 0.4685<br>0.0567  | 0.4056<br>0.0712    | 0.5712<br>0.0607    | 0.7406<br>0.0580    | 0.2995<br>0.0927 | 0.5556<br>0.0870 | 0.6051<br>0.0832 | 0.4552<br>0.0707 | 0.5094<br>0.0666 | 0.5204<br>0.0680 | 0.00             | 0.00    | 0.00 | 2137   |   |
|                 |           | 3      | 0.5107<br>0.0327 | 0.0717<br>0.0565  | 0.5199<br>0.0514  | 0.4452<br>0.0622    | 0.6207<br>0.0507    | 0.7951<br>0.0468    | 0.3013<br>0.0786 | 0.5311<br>0.0757 | 0.6025<br>0.0712 | 0.4353<br>0.0593 | 0.5040<br>0.0553 | 0.5096<br>0.0568 | 1.00             | 0.00    | 0.00 | 2483   |   |
|                 |           | 5      | 0.5670<br>0.0300 | 0.0332<br>0.0547  | 0.5666<br>0.0493  | 0.4784<br>0.0573    | 0.6665<br>0.0445    | 0.8558<br>0.0391    | 0.3005<br>0.0701 | 0.5113<br>0.0699 | 0.5994<br>0.0654 | 0.4134<br>0.0529 | 0.5019<br>0.0485 | 0.5029<br>0.0506 | 0.00             | 0.00    | 0.00 | 7010   |   |
|                 |           | 7      | 0.5830<br>0.0293 | 0.0193<br>0.0544  | 0.5822<br>0.0487  | 0.4900<br>0.0558    | 0.6816<br>0.0428    | 0.8732<br>0.0368    | 0.2985<br>0.0680 | 0.5062<br>0.0685 | 0.5987<br>0.0640 | 0.4078<br>0.0512 | 0.4995<br>0.0469 | 0.5013<br>0.0490 | 0.00             | 0.00    | 0.00 | 12623  |   |
|                 | OrdPLSc   | 2      | 0.6101<br>0.0467 | -0.0065<br>0.1023 | 0.6138<br>0.0920  | 0.5030<br>0.0877    | 0.6999<br>0.0718    | 0.8846<br>0.0601    | 0.2976<br>0.1058 | 0.4963<br>0.1176 | 0.5943<br>0.1057 | 0.3917<br>0.0933 | 0.5024<br>0.0764 | 0.4996<br>0.0856 | 62.00            | 0.00    | 0.00 | 118064 |   |
|                 |           | 3      | 0.6054<br>0.0370 | 0.0038<br>0.0748  | 0.6036<br>0.0684  | 0.5077<br>0.0758    | 0.7035<br>0.0610    | 0.8906<br>0.0456    | 0.2998<br>0.0842 | 0.4940<br>0.0917 | 0.5982<br>0.0829 | 0.3970<br>0.0705 | 0.4998<br>0.0598 | 0.4988<br>0.0655 | 29.00            | 0.00    | 0.00 | 54083  |   |
|                 |           | 5      | 0.6049<br>0.0313 | 0.0020<br>0.0611  | 0.6035<br>0.0555  | 0.5025<br>0.0645    | 0.6985<br>0.0506    | 0.8947<br>0.0385    | 0.3003<br>0.0719 | 0.4953<br>0.0757 | 0.5986<br>0.0695 | 0.3974<br>0.0567 | 0.5006<br>0.0499 | 0.4989<br>0.0535 | 5.00             | 0.00    | 0.00 | 31682  |   |
|                 |           | 7      | 0.6033<br>0.0299 | 0.0016<br>0.0575  | 0.6028<br>0.0520  | 0.5040<br>0.0607    | 0.6995<br>0.0468    | 0.8937<br>0.0364    | 0.2983<br>0.0689 | 0.4978<br>0.0715 | 0.5979<br>0.0661 | 0.3993<br>0.0532 | 0.4988<br>0.0474 | 0.4991<br>0.0504 | 7.00             | 0.00    | 0.00 | 21461  |   |
|                 | Moderate  | PLS    | 2                | 0.4338<br>0.0379  | 0.0768<br>0.0493  | 0.3695<br>0.0455    | 0.5715<br>0.0644    | 0.7520<br>0.0400    | 0.8497<br>0.0244 | 0.2962<br>0.0971 | 0.5560<br>0.0915 | 0.6093<br>0.0873 | 0.4611<br>0.0741 | 0.5077<br>0.0705 | 0.5208<br>0.0715 | 0.00    | 0.00 | 0.00   | 0 |
|                 |           |        | 3                | 0.5242<br>0.0322  | 0.0521<br>0.0479  | 0.4488<br>0.0429    | 0.6215<br>0.0472    | 0.7914<br>0.0263    | 0.8752<br>0.0144 | 0.2990<br>0.0766 | 0.5271<br>0.0748 | 0.6024<br>0.0703 | 0.4297<br>0.0583 | 0.5046<br>0.0540 | 0.5077<br>0.0558 | 0.00    | 0.00 | 0.00   | 0 |
|                 |           |        | 5                | 0.5554<br>0.0315  | 0.0334<br>0.0486  | 0.4842<br>0.0435    | 0.6377<br>0.0442    | 0.8088<br>0.0234    | 0.8875<br>0.0121 | 0.2988<br>0.0729 | 0.5156<br>0.0727 | 0.6009<br>0.0682 | 0.4176<br>0.0556 | 0.5015<br>0.0512 | 0.5051<br>0.0532 | 0.00    | 0.00 | 0.00   | 0 |
|                 |           |        | 7                | 0.5737<br>0.0304  | 0.0225<br>0.0486  | 0.5045<br>0.0433    | 0.6479<br>0.0417    | 0.8178<br>0.0216    | 0.8937<br>0.0109 | 0.2979<br>0.0701 | 0.5090<br>0.0707 | 0.6000<br>0.0659 | 0.4107<br>0.0534 | 0.5003<br>0.0488 | 0.5029<br>0.0510 | 0.00    | 0.00 | 0.00   | 0 |
|                 |           | OrdPLS | 2                | 0.6084<br>0.0488  | -0.0044<br>0.0956 | 0.5487<br>0.0844    | 0.6610<br>0.0633    | 0.8311<br>0.0349    | 0.9032<br>0.0194 | 0.2964<br>0.1119 | 0.4916<br>0.1242 | 0.5982<br>0.1109 | 0.3951<br>0.0979 | 0.4996<br>0.0806 | 0.4981<br>0.0898 | 0.00    | 0.00 | 0.00   | 0 |
|                 |           |        | 3                | 0.6069<br>0.0358  | 0.0014<br>0.0647  | 0.5411<br>0.0576    | 0.6642<br>0.0471    | 0.8320<br>0.0249    | 0.9041<br>0.0130 | 0.2986<br>0.0817 | 0.4942<br>0.0881 | 0.5988<br>0.0799 | 0.3960<br>0.0675 | 0.5014<br>0.0577 | 0.4981<br>0.0629 | 0.00    | 0.00 | 0.00   | 0 |
|                 |           |        | 5                | 0.6043<br>0.0324  | 0.0020<br>0.0568  | 0.5404<br>0.0504    | 0.6634<br>0.0431    | 0.8324<br>0.0220    | 0.9041<br>0.0111 | 0.3002<br>0.0743 | 0.4954<br>0.0783 | 0.5989<br>0.0718 | 0.3973<br>0.0590 | 0.4999<br>0.0519 | 0.4992<br>0.0556 | 0.00    | 0.00 | 0.00   | 0 |
|                 |           |        | 7                | 0.6039<br>0.0304  | 0.0019<br>0.0526  | 0.5399<br>0.0465    | 0.6642<br>0.0404    | 0.8326<br>0.0204    | 0.9042<br>0.0101 | 0.2989<br>0.0698 | 0.4964<br>0.0729 | 0.5986<br>0.0672 | 0.3984<br>0.0544 | 0.4993<br>0.0483 | 0.4992<br>0.0515 | 0.00    | 0.00 | 0.00   | 0 |
| PLSc            |           | 2      | 0.4338<br>0.0379 | 0.0963<br>0.0619  | 0.4624<br>0.0585  | 0.3968<br>0.0743    | 0.5650<br>0.0637    | 0.7329<br>0.0611    | 0.2962<br>0.0970 | 0.5560<br>0.0913 | 0.6093<br>0.0872 | 0.4611<br>0.0740 | 0.5077<br>0.0705 | 0.5208<br>0.0715 | 0.00             | 0.00    | 0.00 | 2112   |   |
|                 |           | 3      | 0.5242<br>0.0322 | 0.0613<br>0.0563  | 0.5277<br>0.0514  | 0.4535<br>0.0616    | 0.6326<br>0.0498    | 0.8135<br>0.0453    | 0.2990<br>0.0767 | 0.5271<br>0.0748 | 0.6024<br>0.0703 | 0.4297<br>0.0583 | 0.5046<br>0.0540 | 0.5077<br>0.0558 | 0.00             | 0.00    | 0.00 | 3544   |   |
|                 |           | 5      | 0.5554<br>0.0315 | 0.0384<br>0.0559  | 0.5563<br>0.0508  | 0.4718<br>0.0597    | 0.6604<br>0.0469    | 0.8491<br>0.0413    | 0.2988<br>0.0730 | 0.5156<br>0.0728 | 0.6009<br>0.0683 | 0.4176<br>0.0555 | 0.5015<br>0.0512 | 0.5051<br>0.0531 | 0.00             | 0.00    | 0.00 | 7114   |   |
|                 |           | 7      | 0.5737<br>0.0305 | 0.0256<br>0.0553  | 0.5733<br>0.0499  | 0.4835<br>0.0576    | 0.6757<br>0.0447    | 0.8655<br>0.0387    | 0.2980<br>0.0701 | 0.5088<br>0.0660 | 0.6001<br>0.0660 | 0.4108<br>0.0534 | 0.5004<br>0.0488 | 0.5029<br>0.0510 | 1.00             | 0.00    | 0.00 | 10344  |   |
| OrdPLSc         |           | 2      | 0.6096<br>0.0489 | -0.0020<br>0.1082 | 0.6127<br>0.0968  | 0.4983<br>0.0922    | 0.7018<br>0.0751    | 0.8820<br>0.0626    | 0.2977<br>0.1119 | 0.4922<br>0.1243 | 0.5969<br>0.1112 | 0.3956<br>0.0982 | 0.4994<br>0.0807 | 0.4975<br>0.0900 | 68.00            | 0.00    | 0.00 | 125118 |   |
|                 |           | 3      | 0.6070<br>0.0359 | 0.0017<br>0.0720  | 0.6038<br>0.0658  | 0.5080<br>0.0734    | 0.7013<br>0.0590    | 0.8918<br>0.0441    | 0.2989<br>0.0816 | 0.4948<br>0.0882 | 0.5982<br>0.0801 | 0.3957<br>0.0676 | 0.5013<br>0.0577 | 0.4985<br>0.0630 | 21.00            | 0.00    | 0.00 | 46862  |   |
|                 |           | 5      | 0.6046<br>0.0324 | 0.0021<br>0.0634  | 0.6034<br>0.0576  | 0.5033<br>0.0665    | 0.7005<br>0.0521    | 0.8937<br>0.0396    | 0.3001<br>0.0743 | 0.4955<br>0.0783 | 0.5988<br>0.0719 | 0.3975<br>0.0589 | 0.4998<br>0.0518 | 0.4991<br>0.0555 | 12.00            | 0.00    | 0.00 | 33044  |   |
|                 |           | 7      | 0.6039<br>0.0303 | 0.0022<br>0.0587  | 0.6031<br>0.0531  | 0.5035<br>0.0618    | 0.7001<br>0.0479    | 0.8939<br>0.0371    | 0.2992<br>0.0698 | 0.4962<br>0.0728 | 0.5987<br>0.0671 | 0.3984<br>0.0544 | 0.4989<br>0.0483 | 0.4995<br>0.0514 | 6.00             | 0.00    | 0.00 | 24475  |   |

Table 5: Results for the model with two composites and one common factor

| Threshold dist. | Estimator       | # cat            | $\gamma_1=0.6$    | $\gamma_2=0.0$    | $\beta=0.6$       | $\lambda_{y_1}=0.5$ | $\lambda_{y_2}=0.7$ | $\lambda_{y_3}=0.9$ | $w_{x_1}=0.3$    | $w_{x_2}=0.5$    | $w_{x_3}=0.6$    | $w_{y_{11}}=0.4$ | $w_{y_{12}}=0.5$ | $w_{y_{13}}=0.5$ | Load.            | CompCor | note   | Boot |   |
|-----------------|-----------------|------------------|-------------------|-------------------|-------------------|---------------------|---------------------|---------------------|------------------|------------------|------------------|------------------|------------------|------------------|------------------|---------|--------|------|---|
| Ext. Asymm.     | PLS             | 2                | 0.3681<br>0.0500  | 0.0779<br>0.0585  | 0.3193<br>0.0561  | 0.5310<br>0.0971    | 0.7267<br>0.0658    | 0.8392<br>0.0420    | 0.2765<br>0.1331 | 0.5774<br>0.1281 | 0.6123<br>0.1244 | 0.4792<br>0.1069 | 0.5072<br>0.1033 | 0.5320<br>0.1036 | 0.00             | 0.00    | 0.00   | 0    |   |
|                 |                 | 3                | 0.4523<br>0.0416  | 0.0659<br>0.0530  | 0.3869<br>0.0501  | 0.5779<br>0.0676    | 0.7673<br>0.0405    | 0.8642<br>0.0229    | 0.2870<br>0.0996 | 0.5545<br>0.0970 | 0.6052<br>0.0932 | 0.4520<br>0.0787 | 0.5064<br>0.0745 | 0.5213<br>0.0759 | 0.00             | 0.00    | 0.00   | 0    |   |
|                 |                 | 5                | 0.5194<br>0.0352  | 0.0457<br>0.0503  | 0.4480<br>0.0460  | 0.6155<br>0.0518    | 0.7969<br>0.0285    | 0.8820<br>0.0149    | 0.2912<br>0.0814 | 0.5304<br>0.0807 | 0.6026<br>0.0764 | 0.4303<br>0.0631 | 0.5038<br>0.0587 | 0.5099<br>0.0605 | 0.00             | 0.00    | 0.00   | 0    |   |
|                 |                 | 7                | 0.5461<br>0.0331  | 0.0339<br>0.0498  | 0.4752<br>0.0450  | 0.6313<br>0.0470    | 0.8089<br>0.0250    | 0.8892<br>0.0126    | 0.2939<br>0.0759 | 0.5215<br>0.0762 | 0.6000<br>0.0719 | 0.4211<br>0.0587 | 0.5024<br>0.0540 | 0.5061<br>0.0562 | 0.00             | 0.00    | 0.00   | 0    |   |
|                 |                 | 2                | 0.6153<br>0.0708  | -0.0155<br>0.1784 | 0.5629<br>0.1515  | 0.6596<br>0.1005    | 0.8306<br>0.0602    | 0.9023<br>0.0398    | 0.2897<br>0.1813 | 0.4894<br>0.1942 | 0.5950<br>0.1761 | 0.3884<br>0.1565 | 0.4992<br>0.1247 | 0.5014<br>0.1410 | 0.00             | 0.00    | 0.00   | 0    |   |
|                 |                 | 3                | 0.6077<br>0.0476  | -0.0021<br>0.0919 | 0.5459<br>0.0805  | 0.6622<br>0.0631    | 0.8314<br>0.0338    | 0.9040<br>0.0180    | 0.2960<br>0.1117 | 0.4948<br>0.1205 | 0.5956<br>0.1088 | 0.3932<br>0.0941 | 0.4998<br>0.0790 | 0.5012<br>0.0866 | 0.00             | 0.00    | 0.00   | 0    |   |
|                 | 5               | 0.6050<br>0.0367 | -0.0004<br>0.0660 | 0.5418<br>0.0584  | 0.6631<br>0.0487  | 0.8320<br>0.0252    | 0.9041<br>0.0129    | 0.2969<br>0.0846    | 0.4950<br>0.0896 | 0.5990<br>0.0818 | 0.3958<br>0.0683 | 0.5007<br>0.0593 | 0.4996<br>0.0640 | 0.00             | 0.00             | 0.00    | 0      |      |   |
|                 | 7               | 0.6042<br>0.0333 | 0.0010<br>0.0585  | 0.5403<br>0.0518  | 0.6644<br>0.0442  | 0.8321<br>0.0225    | 0.9038<br>0.0113    | 0.2991<br>0.0765    | 0.4958<br>0.0804 | 0.5983<br>0.0738 | 0.3978<br>0.0606 | 0.5002<br>0.0532 | 0.4989<br>0.0571 | 0.00             | 0.00             | 0.00    | 0      |      |   |
|                 | 2               | 0.3680<br>0.0500 | 0.1017<br>0.0769  | 0.4165<br>0.0753  | 0.3569<br>0.0999  | 0.5198<br>0.0911    | 0.6896<br>0.0886    | 0.2766<br>0.1331    | 0.5772<br>0.1280 | 0.6125<br>0.1242 | 0.4789<br>0.1069 | 0.5071<br>0.1031 | 0.5324<br>0.1035 | 2.00             | 0.00             | 0.00    | 11492  |      |   |
|                 | 3               | 0.4523<br>0.0415 | 0.0801<br>0.0646  | 0.4701<br>0.0618  | 0.4101<br>0.0799  | 0.5877<br>0.0680    | 0.7730<br>0.0630    | 0.2870<br>0.0997    | 0.5545<br>0.0971 | 0.6052<br>0.0933 | 0.4520<br>0.0786 | 0.5064<br>0.0744 | 0.5213<br>0.0758 | 0.00             | 0.00             | 0.00    | 8396   |      |   |
|                 | 5               | 0.5194<br>0.0351 | 0.0533<br>0.0588  | 0.5221<br>0.0546  | 0.4510<br>0.0669  | 0.6374<br>0.0539    | 0.8299<br>0.0481    | 0.2912<br>0.0815    | 0.5304<br>0.0808 | 0.6026<br>0.0766 | 0.4303<br>0.0631 | 0.5038<br>0.0587 | 0.5099<br>0.0605 | 0.00             | 0.00             | 0.00    | 10865  |      |   |
|                 | 7               | 0.5461<br>0.0331 | 0.0390<br>0.0572  | 0.5454<br>0.0525  | 0.4674<br>0.0628  | 0.6578<br>0.0497    | 0.8523<br>0.0433    | 0.2939<br>0.0760    | 0.5215<br>0.0762 | 0.6000<br>0.0719 | 0.4211<br>0.0586 | 0.5024<br>0.0540 | 0.5061<br>0.0562 | 0.00             | 0.00             | 0.00    | 12985  |      |   |
|                 | 2               | 0.6138<br>0.0711 | -0.0187<br>0.1970 | 0.6352<br>0.1696  | 0.5050<br>0.1416  | 0.7024<br>0.1136    | 0.8608<br>0.0950    | 0.2942<br>0.1813    | 0.4871<br>0.1949 | 0.5953<br>0.1765 | 0.3897<br>0.1568 | 0.4973<br>0.1251 | 0.5004<br>0.1413 | 134.00           | 0.00             | 0.00    | 192388 |      |   |
|                 | 3               | 0.6073<br>0.0476 | -0.0051<br>0.1021 | 0.6108<br>0.0916  | 0.5119<br>0.0962  | 0.7060<br>0.0766    | 0.8860<br>0.0553    | 0.2966<br>0.1117    | 0.4939<br>0.1209 | 0.5959<br>0.1090 | 0.3944<br>0.0938 | 0.4997<br>0.0789 | 0.5000<br>0.0865 | 50.00            | 0.00             | 0.00    | 79697  |      |   |
|                 | 5               | 0.6050<br>0.0367 | -0.0010<br>0.0734 | 0.6049<br>0.0666  | 0.5057<br>0.0757  | 0.7015<br>0.0594    | 0.8919<br>0.0439    | 0.2985<br>0.0845    | 0.4943<br>0.0897 | 0.5992<br>0.0819 | 0.3957<br>0.0683 | 0.5009<br>0.0592 | 0.4996<br>0.0639 | 22.00            | 0.00             | 0.00    | 48922  |      |   |
|                 | 7               | 0.6042<br>0.0333 | 0.0012<br>0.0652  | 0.6031<br>0.0592  | 0.5036<br>0.0687  | 0.6999<br>0.0536    | 0.8932<br>0.0401    | 0.2998<br>0.0765    | 0.4954<br>0.0805 | 0.5985<br>0.0738 | 0.3980<br>0.0606 | 0.5004<br>0.0533 | 0.4987<br>0.0572 | 10.00            | 0.00             | 0.00    | 37311  |      |   |
|                 | Alt. Mod. Asym. | PLS              | 2                 | 0.4278<br>0.0367  | 0.0845<br>0.0481  | 0.3608<br>0.0436    | 0.5773<br>0.0630    | 0.7353<br>0.0406    | 0.8378<br>0.0258 | 0.2968<br>0.0958 | 0.5676<br>0.0883 | 0.6062<br>0.0849 | 0.4600<br>0.0721 | 0.5174<br>0.0688 | 0.5164<br>0.0699 | 0.00    | 0.00   | 0.00 | 0 |
|                 |                 |                  | 3                 | 0.5233<br>0.0322  | 0.0529<br>0.0477  | 0.4480<br>0.0427    | 0.6211<br>0.0473    | 0.7899<br>0.0264    | 0.8751<br>0.0144 | 0.3008<br>0.0766 | 0.5281<br>0.0747 | 0.6013<br>0.0703 | 0.4291<br>0.0582 | 0.5054<br>0.0540 | 0.5082<br>0.0558 | 0.00    | 0.00   | 0.00 | 0 |
|                 |                 |                  | 5                 | 0.5520<br>0.0306  | 0.0413<br>0.0478  | 0.4758<br>0.0422    | 0.6394<br>0.0433    | 0.7983<br>0.0231    | 0.8812<br>0.0123 | 0.2969<br>0.0719 | 0.5253<br>0.0706 | 0.5971<br>0.0666 | 0.4177<br>0.0541 | 0.5068<br>0.0499 | 0.5020<br>0.0519 | 0.00    | 0.00   | 0.00 | 0 |
|                 |                 |                  | 7                 | 0.5716<br>0.0298  | 0.0279<br>0.0479  | 0.4984<br>0.0424    | 0.6491<br>0.0411    | 0.8109<br>0.0214    | 0.8902<br>0.0109 | 0.2976<br>0.0693 | 0.5145<br>0.0692 | 0.5977<br>0.0649 | 0.4107<br>0.0522 | 0.5036<br>0.0480 | 0.5014<br>0.0500 | 0.00    | 0.00   | 0.00 | 0 |
|                 |                 |                  | 2                 | 0.6109<br>0.0494  | -0.0048<br>0.0974 | 0.5493<br>0.0866    | 0.6634<br>0.0627    | 0.8309<br>0.0358    | 0.9030<br>0.0205 | 0.2952<br>0.1120 | 0.4939<br>0.1265 | 0.5978<br>0.1125 | 0.3964<br>0.0993 | 0.5001<br>0.0811 | 0.4970<br>0.0909 | 0.00    | 0.00   | 0.00 | 0 |
| 3               |                 |                  | 0.6063<br>0.0359  | 0.0019<br>0.0646  | 0.5407<br>0.0574  | 0.6637<br>0.0473    | 0.8314<br>0.0251    | 0.9044<br>0.0130    | 0.3003<br>0.0818 | 0.4948<br>0.0882 | 0.5977<br>0.0801 | 0.3954<br>0.0675 | 0.5016<br>0.0578 | 0.4990<br>0.0630 | 0.00             | 0.00    | 0.00   | 0    |   |
| 5               |                 | 0.6053<br>0.0323 | 0.0027<br>0.0569  | 0.5395<br>0.0505  | 0.6636<br>0.0430  | 0.8321<br>0.0221    | 0.9039<br>0.0113    | 0.2984<br>0.0741    | 0.4969<br>0.0788 | 0.5981<br>0.0723 | 0.3981<br>0.0591 | 0.4995<br>0.0519 | 0.4988<br>0.0556 | 0.00             | 0.00             | 0.00    | 0      |      |   |
| 7               |                 | 0.6040<br>0.0304 | 0.0024<br>0.0527  | 0.5388<br>0.0466  | 0.6644<br>0.0404  | 0.8318<br>0.0205    | 0.9042<br>0.0101    | 0.2987<br>0.0699    | 0.4970<br>0.0730 | 0.5982<br>0.0672 | 0.3980<br>0.0544 | 0.4997<br>0.0483 | 0.4995<br>0.0514 | 0.00             | 0.00             | 0.00    | 0      |      |   |
| 2               |                 | 0.4278<br>0.0367 | 0.1082<br>0.0617  | 0.4623<br>0.0575  | 0.3878<br>0.0718  | 0.5498<br>0.0610    | 0.7016<br>0.0595    | 0.2968<br>0.0958    | 0.5676<br>0.0884 | 0.6062<br>0.0850 | 0.4600<br>0.0722 | 0.5174<br>0.0687 | 0.5164<br>0.0699 | 0.00             | 0.00             | 0.00    | 1024   |      |   |
| 3               |                 | 0.5233<br>0.0322 | 0.0624<br>0.0563  | 0.5270<br>0.0514  | 0.4521<br>0.0618  | 0.6310<br>0.0497    | 0.8131<br>0.0452    | 0.3008<br>0.0766    | 0.5281<br>0.0747 | 0.6013<br>0.0704 | 0.4291<br>0.0582 | 0.5054<br>0.0539 | 0.5082<br>0.0558 | 0.00             | 0.00             | 0.00    | 2971   |      |   |
| 5               |                 | 0.5520<br>0.0306 | 0.0479<br>0.0555  | 0.5523<br>0.0499  | 0.4654<br>0.0583  | 0.6530<br>0.0459    | 0.8308<br>0.0410    | 0.2969<br>0.0720    | 0.5253<br>0.0707 | 0.5971<br>0.0666 | 0.4177<br>0.0540 | 0.5068<br>0.0500 | 0.5020<br>0.0518 | 0.00             | 0.00             | 0.00    | 2996   |      |   |
| 7               |                 | 0.5716<br>0.0298 | 0.0319<br>0.0548  | 0.5695<br>0.0492  | 0.4799<br>0.0567  | 0.6697<br>0.0441    | 0.8562<br>0.0384    | 0.2976<br>0.0693    | 0.5145<br>0.0691 | 0.5977<br>0.0648 | 0.4107<br>0.0523 | 0.5036<br>0.0480 | 0.5014<br>0.0501 | 0.00             | 0.00             | 0.00    | 6490   |      |   |
| 2               |                 | 0.6115<br>0.0497 | -0.0061<br>0.1104 | 0.6165<br>0.0995  | 0.5052<br>0.0924  | 0.6971<br>0.0775    | 0.8828<br>0.0642    | 0.2954<br>0.1125    | 0.4943<br>0.1270 | 0.5978<br>0.1131 | 0.3961<br>0.0995 | 0.5002<br>0.0816 | 0.4962<br>0.0912 | 75.00            | 0.00             | 0.00    | 145346 |      |   |
| 3               |                 | 0.6065<br>0.0359 | 0.0026<br>0.0719  | 0.6027<br>0.0659  | 0.5062<br>0.0742  | 0.6997<br>0.0597    | 0.8934<br>0.0441    | 0.3000<br>0.0818    | 0.4948<br>0.0883 | 0.5980<br>0.0801 | 0.3950<br>0.0675 | 0.5020<br>0.0579 | 0.4991<br>0.0629 | 17.00            | 0.00             | 0.00    | 51479  |      |   |
| 5               |                 | 0.6053<br>0.0324 | 0.0029<br>0.0635  | 0.6026<br>0.0579  | 0.5023<br>0.0670  | 0.6991<br>0.0529    | 0.8939<br>0.0401    | 0.2986<br>0.0741    | 0.4967<br>0.0788 | 0.5983<br>0.0722 | 0.3981<br>0.0590 | 0.4994<br>0.0518 | 0.4990<br>0.0556 | 7.00             | 0.00             | 0.00    | 36472  |      |   |
| 7               |                 | 0.6041<br>0.0303 | 0.0028<br>0.0588  | 0.6017<br>0.0532  | 0.5038<br>0.0618  | 0.6987<br>0.0481    | 0.8943<br>0.0371    | 0.2993<br>0.0698    | 0.4972<br>0.0727 | 0.5979<br>0.0672 | 0.3981<br>0.0544 | 0.4994<br>0.0483 | 0.4996<br>0.0513 | 8.00             | 0.00             | 0.00    | 24188  |      |   |

Table 6: Results for the model with two composites and one common factor

| Threshold dist. | Estimator | # cat | $\gamma_1=0.6$   | $\gamma_2=0.0$    | $\beta=0.6$      | $\lambda_{y_1}=0.5$ | $\lambda_{y_2}=0.7$ | $\lambda_{y_3}=0.9$ | $w_{x_1}=0.3$    | $w_{x_2}=0.5$    | $w_{x_3}=0.6$    | $w_{y_1}=0.4$    | $w_{y_2}=0.5$    | $w_{y_3}=0.5$    | Load.  | CompCor | note | Boot    |
|-----------------|-----------|-------|------------------|-------------------|------------------|---------------------|---------------------|---------------------|------------------|------------------|------------------|------------------|------------------|------------------|--------|---------|------|---------|
| Alt. Ext. Asym. | PLS       | 2     | 0.3240<br>0.0421 | 0.1059<br>0.0513  | 0.2691<br>0.0457 | 0.5489<br>0.0931    | 0.6523<br>0.0847    | 0.7686<br>0.0610    | 0.2933<br>0.1274 | 0.6288<br>0.1164 | 0.5983<br>0.1147 | 0.4696<br>0.0978 | 0.5626<br>0.1028 | 0.5101<br>0.0956 | 0.00   | 0.00    | 0.00 | 0       |
|                 |           | 3     | 0.4224<br>0.0365 | 0.0964<br>0.0482  | 0.3494<br>0.0425 | 0.5929<br>0.0627    | 0.7024<br>0.0464    | 0.8145<br>0.0306    | 0.2929<br>0.0952 | 0.5964<br>0.0876 | 0.5958<br>0.0855 | 0.4493<br>0.0718 | 0.5421<br>0.0711 | 0.5047<br>0.0697 | 0.00   | 0.00    | 0.00 | 0       |
|                 |           | 5     | 0.5047<br>0.0328 | 0.0674<br>0.0479  | 0.4251<br>0.0422 | 0.6233<br>0.0493    | 0.7602<br>0.0295    | 0.8580<br>0.0169    | 0.2929<br>0.0791 | 0.5548<br>0.0753 | 0.5961<br>0.0721 | 0.4285<br>0.0598 | 0.5227<br>0.0562 | 0.5015<br>0.0577 | 0.00   | 0.00    | 0.00 | 0       |
|                 |           | 7     | 0.5338<br>0.0314 | 0.0480<br>0.0479  | 0.4601<br>0.0420 | 0.6342<br>0.0455    | 0.7834<br>0.0251    | 0.8737<br>0.0135    | 0.2893<br>0.0749 | 0.5400<br>0.0725 | 0.5956<br>0.0686 | 0.4232<br>0.0562 | 0.5143<br>0.0521 | 0.4994<br>0.0540 | 0.00   | 0.00    | 0.00 | 0       |
|                 | OrdPLS    | 2     | 0.6554<br>0.1258 | -0.1850<br>0.8609 | 0.7143<br>0.8002 | 0.6479<br>0.1732    | 0.8649<br>0.1485    | 0.9195<br>0.1356    | 0.2799<br>0.3040 | 0.4442<br>0.5921 | 0.5991<br>0.5213 | 0.4026<br>0.3042 | 0.4591<br>0.2826 | 0.4896<br>0.2511 | 0.00   | 0.00    | 1.00 | 0       |
|                 |           | 3     | 0.6130<br>0.0502 | -0.0055<br>0.1009 | 0.5502<br>0.0899 | 0.6652<br>0.0618    | 0.8323<br>0.0378    | 0.9040<br>0.0220    | 0.2946<br>0.1135 | 0.4933<br>0.1329 | 0.5982<br>0.1172 | 0.3978<br>0.1004 | 0.4943<br>0.0836 | 0.5005<br>0.0910 | 0.00   | 0.00    | 0.00 | 0       |
|                 |           | 5     | 0.6043<br>0.0370 | -0.0024<br>0.0667 | 0.5444<br>0.0591 | 0.6624<br>0.0483    | 0.8328<br>0.0259    | 0.9049<br>0.0136    | 0.2918<br>0.0852 | 0.4966<br>0.0930 | 0.5991<br>0.0838 | 0.4013<br>0.0692 | 0.4968<br>0.0600 | 0.4994<br>0.0643 | 0.00   | 0.00    | 0.00 | 0       |
|                 |           | 7     | 0.6052<br>0.0333 | 0.0009<br>0.0589  | 0.5403<br>0.0522 | 0.6646<br>0.0439    | 0.8315<br>0.0230    | 0.9040<br>0.0118    | 0.2983<br>0.0764 | 0.4971<br>0.0817 | 0.5976<br>0.0747 | 0.3976<br>0.0610 | 0.4988<br>0.0537 | 0.5003<br>0.0571 | 0.00   | 0.00    | 0.00 | 0       |
|                 | PLSc      | 2     | 0.3240<br>0.0421 | 0.1653<br>0.0806  | 0.4212<br>0.0759 | 0.2931<br>0.0837    | 0.4302<br>0.0742    | 0.5075<br>0.0810    | 0.2933<br>0.1275 | 0.6288<br>0.1165 | 0.5983<br>0.1146 | 0.4696<br>0.0979 | 0.5626<br>0.1027 | 0.5101<br>0.0956 | 0.00   | 0.00    | 0.00 | 1432    |
|                 |           | 3     | 0.4207<br>0.0365 | 0.1240<br>0.0646  | 0.4749<br>0.0588 | 0.3616<br>0.0699    | 0.5322<br>0.0587    | 0.6370<br>0.0593    | 0.2885<br>0.0956 | 0.5964<br>0.0881 | 0.5948<br>0.0859 | 0.4558<br>0.0716 | 0.5405<br>0.0709 | 0.5004<br>0.0698 | 0.00   | 0.00    | 0.00 | 253     |
|                 |           | 5     | 0.5047<br>0.0328 | 0.0818<br>0.0582  | 0.5162<br>0.0525 | 0.4285<br>0.0625    | 0.6088<br>0.0508    | 0.7637<br>0.0475    | 0.2929<br>0.0792 | 0.5548<br>0.0753 | 0.5961<br>0.0720 | 0.4285<br>0.0598 | 0.5227<br>0.0561 | 0.5015<br>0.0576 | 0.00   | 0.00    | 0.00 | 1104    |
|                 |           | 7     | 0.5338<br>0.0314 | 0.0564<br>0.0565  | 0.5419<br>0.0506 | 0.4492<br>0.0600    | 0.6401<br>0.0475    | 0.8074<br>0.0431    | 0.2893<br>0.0749 | 0.5400<br>0.0724 | 0.5956<br>0.0686 | 0.4232<br>0.0562 | 0.5143<br>0.0521 | 0.4994<br>0.0540 | 0.00   | 0.00    | 0.00 | 1769    |
|                 | OrdPLSc   | 2     | 0.6505<br>0.1300 | -0.1900<br>0.8872 | 0.7851<br>0.8251 | 0.5623<br>0.2236    | 0.7094<br>0.1828    | 0.8522<br>0.1594    | 0.2817<br>0.3089 | 0.4362<br>0.5995 | 0.6057<br>0.5311 | 0.3909<br>0.3035 | 0.4813<br>0.2797 | 0.4914<br>0.2499 | 681.00 | 35.00   | 2.00 | 1030941 |
|                 |           | 3     | 0.6123<br>0.0502 | -0.0059<br>0.1105 | 0.6102<br>0.1015 | 0.5220<br>0.0979    | 0.7100<br>0.0835    | 0.8861<br>0.0598    | 0.2964<br>0.1138 | 0.4913<br>0.1330 | 0.5994<br>0.1170 | 0.3966<br>0.1002 | 0.4963<br>0.0832 | 0.4998<br>0.0908 | 90.00  | 0.00    | 0.00 | 111322  |
|                 |           | 5     | 0.6040<br>0.0370 | -0.0021<br>0.0740 | 0.6056<br>0.0678 | 0.5064<br>0.0765    | 0.7023<br>0.0626    | 0.8946<br>0.0453    | 0.2927<br>0.0851 | 0.4953<br>0.0928 | 0.5999<br>0.0836 | 0.4007<br>0.0693 | 0.4973<br>0.0601 | 0.4993<br>0.0644 | 28.00  | 0.00    | 0.00 | 64260   |
|                 |           | 7     | 0.6051<br>0.0333 | 0.0008<br>0.0655  | 0.6029<br>0.0598 | 0.5046<br>0.0693    | 0.6994<br>0.0550    | 0.8938<br>0.0412    | 0.2985<br>0.0764 | 0.4975<br>0.0817 | 0.5973<br>0.0748 | 0.3980<br>0.0608 | 0.4987<br>0.0536 | 0.5000<br>0.0571 | 14.00  | 0.00    | 0.00 | 42613   |
